# Supplementary material for: Reaping the catalytic benefits of both surface (NiFe2O4) and underneath (Ni3Fe) layers for the oxygen evolution reaction
Source: Royal Society of Chemistry journal article supplement (doi:10.1039/d0se01926g), 2021-01-01
Supplement: d0se01926g1.pdf [file d0se01926g1.pdf]

## Supplementary Information

Reaping the catalytic benefits of both surface ( $\text{NiFe}_2\text{O}_4$ ) and underneath ( $\text{Ni}_3\text{Fe}$ ) layers for the oxygen evolution reaction

Mohammad Alharthy,<sup>a</sup> Munzir H. Suliman,<sup>a,b</sup> Abdul-Rahman Al-Betar,<sup>a</sup> Yuan Wang,<sup>c</sup> Ziqi Tian,<sup>c</sup> Qasem A. Drmosh,<sup>b</sup> Zain H. Yamani,<sup>b</sup> Mohammad Qamar,<sup>b,d\*</sup>

<sup>a</sup>Department of Chemistry, <sup>b</sup>Center of Excellence in Nanotechnology (CENT), King Fahd University of Petroleum and Minerals, Dhahran 31261, Saudi Arabia.

<sup>c</sup>Ningbo Institute of Materials Technology and Engineering, Chinese Academy of Sciences, 1219 Zhongguan West Road, Ningbo 315201, Zhejiang, P. R. China.

<sup>d</sup>K.A.CARE Energy Research & Innovation Center, King Fahd University of Petroleum and Minerals, Dhahran 31261, Saudi Arabia.

\*Corresponding author – [qamar@kfupm.edu.sa](mailto:qamar@kfupm.edu.sa)

## **Experimental**

### **Materials**

Hydrochloric acid (37%), Potassium persulfate (99.99% trace metals basis), aniline, (Nickel (II) acetate tetrahydrate ( $\geq 99.5\%$ ), Iron (III) acetylacetonate (97%), Benzyl alcohol (99.8%), acetone ( $\geq 99.5\%$ ), and anhydrous ethanol were purchased from Sigma-Aldrich, while Nafion (5% w/w solution) was obtained from Alfa Aesar.

### **Synthesis of Polyaniline (PANI)**

PANI was prepared by oxidative polymerization. Two solutions were prepared by adding 0.5 mL of aniline and 1.55 g of potassium persulfate ( $K_2S_2O_8$ ) each into 50 mL of 1.0 M hydrochloric acid (HCl). Then, the two solutions were mixed together, and the reaction was allowed to take place. Polymerization of aniline or formation of PANI was indicated by the change in color. After 7 min, the reaction was terminated by the addition of 10 mL of water. Finally, the formed precipitate (PANI) was filtered out from the solution using gravity filtration and dried at 90 °C for 4 h.

### **Characterization**

Morphological and detailed microstructural attributes of the materials were discerned with the aid of field emission scanning electron microscope (FESEM), transmission and high-resolution transmission electron microscope and selected area electron diffraction (TEM/HR-TEM, FEI Tecnai TF20) (SAED). Other techniques employed for characterization of the samples were: X-ray diffractometry (XRD, Rigaku MiniFlex), X-ray photoelectron spectroscopy (XPS, Thermo Scientific ESCALAB 250Xi).

### **Electrocatalytic performance evaluation**

The performance was evaluated in a three-electrode cell configuration connected to a potentiostat (EG&G 273A) at ambient conditions. Working electrode was prepared sonicating ( $\sim 30$  min) the slurry consisting of electrocatalyst (2 mg) and 1 ml mixture of 630  $\mu$ l deionized water, 330  $\mu$ l ethanol and 40  $\mu$ l Nafion (1.66%). 6.0  $\mu$ L of sonicated solution was dropped on a pre-cleaned glassy carbon (GC) disc electrode (0.196 mm diameter), and dried under ambient conditions. Saturated calomel electrode (Hg/HgCl<sub>2</sub>, SCE) and graphite rod were used as the reference and the counter electrode, respectively. The SCE

potential was measured experimentally, converted and presented against reversible hydrogen electrode (RHE). Linear sweep voltammetry was performed in a 1.0 M KOH aqueous solution at a scan rate of 5 mV s<sup>-1</sup>. All current density was normalized to the geometric area of the glassy carbon electrode, unless stated otherwise, and presented after *iR* compensation. Electrochemical impedance spectroscopy (EIS) measurements were carried out in 1.0 M KOH between the frequency range of 10<sup>5</sup> Hz and 0.01 Hz with ac amplitude of 10 mV. All the EIS data was normalized to the geometric area of the working electrode.

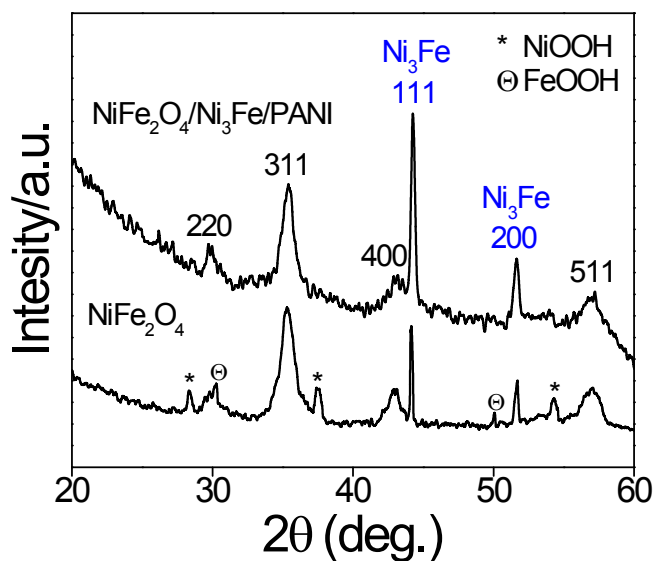

**Fig. S1** Powder XRD of NiFe<sub>2</sub>O<sub>4</sub>/Ni<sub>3</sub>Fe/PANI before and after the stability test.

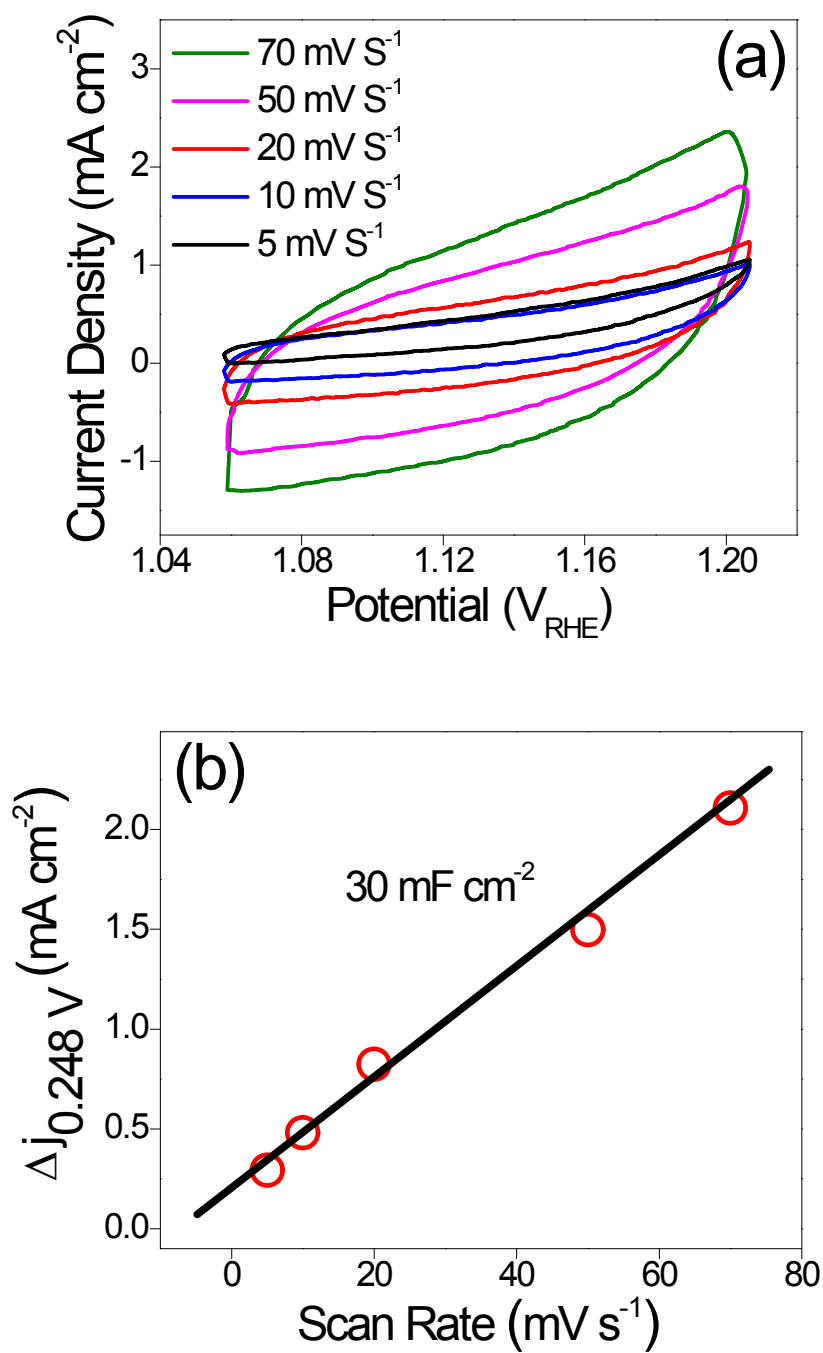

**Fig. S2** Cyclic voltammetry (a) and corresponding slopes (b) of NiFe<sub>2</sub>O<sub>4</sub>.

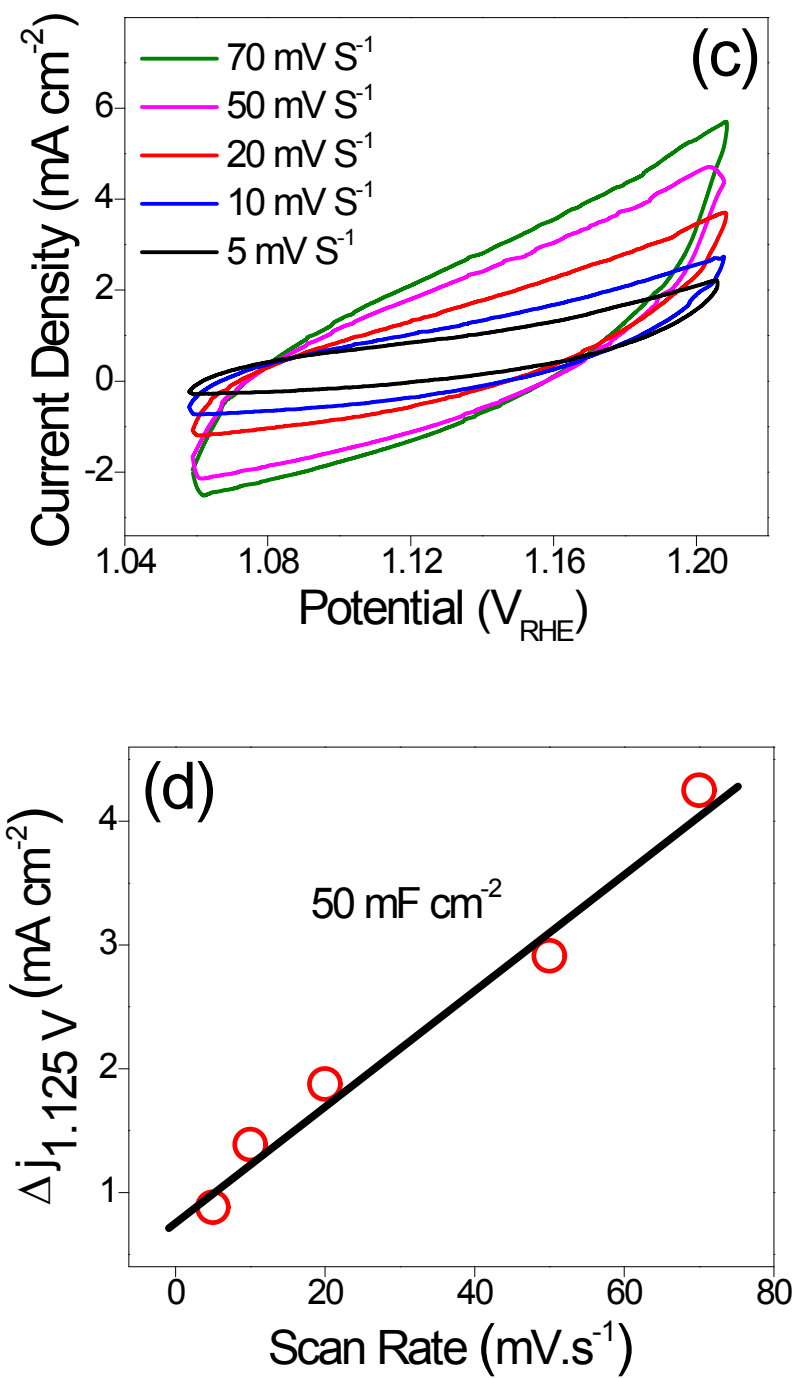

**Fig. S3** Cyclic voltammetry (c) and corresponding slopes (d) of NiFe<sub>2</sub>O<sub>4</sub>/Ni<sub>3</sub>Fe/PANI.

**Table S1.** The OER activity comparison of the NiFe<sub>2</sub>O<sub>4</sub>/Ni<sub>3</sub>Fe/PANI with some advanced transition metal-based electrocatalysts.

| Electrocatalyst                                                   | $\eta_{10}$ | Tafel slope (mV dec <sup>-1</sup> ) | Electrolyte | Reference |
|-------------------------------------------------------------------|-------------|-------------------------------------|-------------|-----------|
| $\alpha$ -Ni(OH) <sub>2</sub> hollow nanospheres                  | 331         | 42                                  | 0.1 M KOH   | 1         |
| NiFe <sub>2</sub> O <sub>4</sub> nanofiber                        | 390         | 60                                  | 1.0 M KOH   | 2         |
| Amorphous Ni(OH) <sub>2</sub> nanosheets/graphite                 | 344         | 46                                  | 0.1 M KOH   | 3         |
| NiCoFe LDH nanoplates                                             | 340         | 93                                  | 0.1 M KOH   | 4         |
| NiCo LDH nanosheets                                               | 420         | 113                                 | 0.1 M KOH   | 5         |
| CoFe <sub>2</sub> O <sub>4</sub> nanoparticles                    | 360         | 54.7                                | 1.0 M KOH   | 6         |
| CoFe <sub>2</sub> O <sub>4</sub> /MWCNT                           | 345         | 38.1                                | 1.0 M KOH   | 6         |
| CoFe <sub>2</sub> O <sub>4</sub> /PANI-MWCNTs                     | 314         | 30.7                                | 1.0 M KOH   | 6         |
| Mesoporous NiFe <sub>2</sub> O <sub>4</sub> nanorods              | 342         | 44                                  | 1.0 M KOH   | 7         |
| FeNi/NiFe <sub>2</sub> O <sub>4</sub> /CN                         | 316         | 60                                  | 1.0 M KOH   | 8         |
| Benzoate ion intercalated Co(OH) <sub>2</sub>                     | 360         | 76                                  | 1.0 M KOH   | 9         |
| Mesoporous NiO/MnO <sub>2</sub> /PANI                             | 345         | 42                                  | 6.0 M KOH   | 10        |
| $\beta$ -Ni(OH) <sub>2</sub> /Cu <sub>2</sub> S hybrid nanosheets | 500         | 89                                  | 0.1 M KOH   | 11        |
| Fe-CoOOH/Graphene                                                 | 330         | 37                                  | 1.0 M KOH   | 12        |
| NC-NiFeS with defects                                             | 350         | 93                                  | 1.0 M KOH   | 13        |
| NiF-O with metal vacancies                                        | 371         | 28                                  | 1.0 M KOH   | 14        |
| NiO                                                               | 445         | 34                                  | 1.0 M KOH   | 14        |
| Co-Fe double atom catalyst                                        | 309         | 37                                  | 1.0 M KOH   | 15        |
| (Co/Fe) <sub>4</sub> O <sub>4</sub>                               | 300         | 36                                  | 1.0 M KOH   | 16        |
| Fe/BIF-91(Co)                                                     | 350         | 71                                  | 1.0 M KOH   | 17        |
| NiFe <sub>2</sub> O <sub>4</sub> nanoparticles                    | 500         | 122                                 | 1.0 M KOH   | 18        |
| Fe-NiNC                                                           | 340         | 54                                  | 1.0 M KOH   | 19        |
| FeNi/graphene                                                     | 380         | 75                                  | 1.0 M KOH   | 20        |
| Fe-N <sub>x</sub> -S/C                                            | 326         | 42                                  | 1.0 M KOH   | 21        |
| Ni <sub>3</sub> Fe/NiFe <sub>2</sub> O <sub>4</sub> /PANI         | 320         | 52                                  | 1.0 M KOH   | This Work |

## References

- 1 M. Gao, W. Sheng, Z. Zhuang, Q. Fang, S. Gu, J. Jiang and Y. Yan, *J. Am. Chem. Soc.*, 2014, **136**, 7077–7084.
- 2 Z. Peng, D. Jia, A.M. Al-Enizi, A.A. Elzatahry and G. Zheng, *Adv. Energ. Mater.*, 2015, **5**, 1402031.
- 3 Y. Gao, H. Li and G. Yang, *Cryst. Growth Des.*, 2015, **15**, 4475.
- 4 L. Qian, Z. Lu, T. Xu, X. Wu, Y. Tian, Y. Li, Z. Huo, X. Sun and X. Duan, *Adv. Energy Mater.*, 2015, **5**, 1500245.
- 5 J. Jiang, A. Zhang, L. Li and L. Ai, *J. Power Sources*, 2015, **278**, 445.
- 6 Y. Liu, J. Li, F. Li, W. Li, H. Yang, X. Zhang, Y. Liu and J. Ma, *J. Mater. Chem. A*, 2016, **4**, 4472–4478.
- 7 G. Liu, K. Wang, X. Gao, D. He and J. Li, *Electrochim. Acta*, 2016, **211**, 871–878.
- 8 Y. Ma, X. Dai, M. Liu, J. Yong, H. Qiao, A. Jin, Z. Li, X. Huang, H. Wang and X. Zhang, *ACS Appl. Mater. Interfaces*, 2016, **8**, 34396–34404.
- 9 L. Tao, C.-Y. Lin, S. Dou, S. Feng, D. Chen, D. Liu, J. Huo, Z. Xia and S. Wang, *Nano Energy*, 2017, **41**, 417–425.
- 10 J. He, M. Wang, W. Wang, R. Miao, W. Zhong, S.-Y. Chen, S. Poges, T. Jafari, W. Song, J. Liu and S.L. Suib, *ACS Appl. Mater. Interfaces*, 2017, **9**, 42676–42687.
- 11 D. Yang, L. Gao and J.-H. Yang, *J. Power Sources*, 2017, **359**, 52–56.
- 12 X. Han, C. Yu, S. Zhou, C. Zhao, H. Huang, J. Yang, Z. Liu, J. Zhao and J. Qiu, *Adv. Energy Mater.*, 2017, **7**, 1602148.
- 13 C. Han, W. Li, C. Shu, H. Guo, H. Liu, S. Dou and J. Wang, *ACS Appl. Energy Mater.*, 2019, **2**, 5363–5372.
- 14 H.J. Lee, S. Back, J.H. Lee, S.H. Choi, Y. Jung and J.W. Choi, *ACS Catal.*, 2019, **9**, 7099–7108.
- 15 L. Bai, C.-S. Hsu, D.T.L. Alexander, H.M. Chen and X. Hu, *J. Am. Chem. Soc.*, 2019, **141**, 14190–14199.
- 16 J. Li, Q. Zhou, C. Zhong, S. Li, Z. Shen, J. Pu, J. Liu, Y. Zhou, H. Zhang and H. Ma, *ACS Catal.*, 2019, **9**, 3878–3887.
- 17 T. Wen, Y. Zheng, J. Zhang, K. Davey and S.-Z. Qiao, *Adv. Sci.*, 2019, **6**, 1801920.
- 18 J. Kang, F. Yan, C. Li, L. Qi, B. Geng, Y. Wang, C. Zhu and Y. Chen, *Catal. Sci. Technol.*, 2020, **10**, 6970–6976.

- 19 X. Zhu, D. Zhang, C.-J. Chen, Q. Zhang, R.-S. Liu, Z. Xia, L. Dai, R. Amal and X. Lu, *Nano Energy*, 2020, **71**, 104597.
- 20 C. Wang, H. Tong, J. Lu, B. Liu, F. Zheng, W. Tao, W. Zhang and Q. Chen, *Carbon*, 2020, **170**, 414-420.
- 21 W. Chen, X. Luo, S. Ling, Y. Zhou, B. Shen, T.J.A. Slater, J.A. Fernandes, T. Lin, J. Wang and Y. Shen, *Carbon*, 2020, **168**, 30 588-596.
